# Supplementary material for: Differentiation Potential of Mesenchymal Stem Cells Is Related to Their Intrinsic Mechanical Properties
Source: PubMed Central journal article supplement — Int Neurourol J. 2017 Apr 21;21(Suppl 1):S24–31. doi: 10.5213/inj.1734856.428 (PMC5426435; doi:10.5213/inj.1734856.428), 2017-04-21
Supplement: inj-1734856-428-suppl1.pdf [file inj-1734856-428-suppl1.pdf]

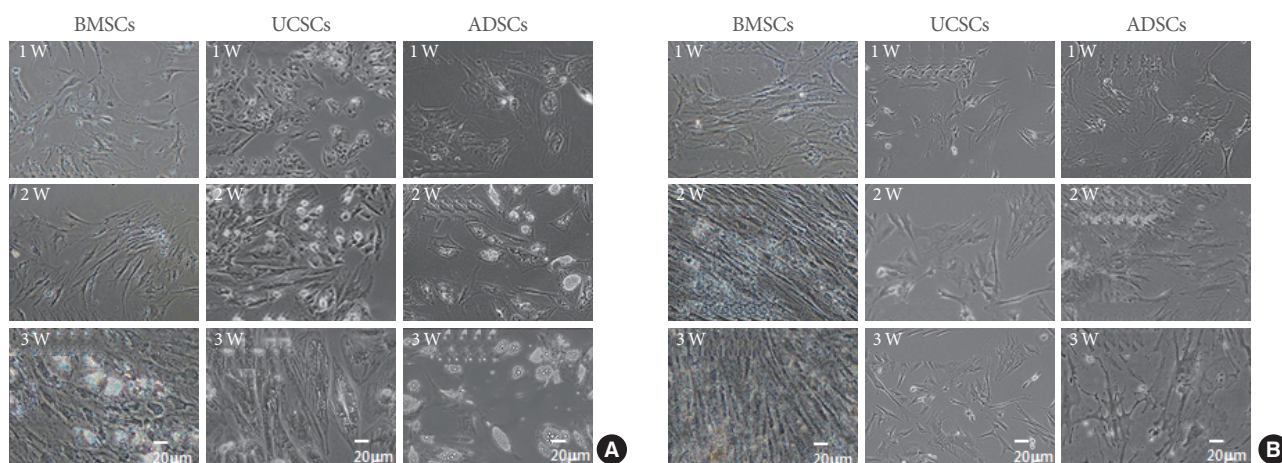

**Supplementary Fig. 1.** Light microscopy images of BMSCs, UCSCs, and ADSCs under adipogenic (A) and the osteogenic (B) induction conditions ( $\times 400$ ). The images were taken from weeks 1 to 3 after induction. MSCs, mesenchymal stem cells; BMSCs, bone marrow-derived MSCs; UCSCs, umbilical cord-derived MSCs; ADSCs, adipose-derived MSCs; 1 W, 1 week; 2 W, 2 weeks; 3 W, 3 weeks. Scale bar represents 20  $\mu\text{m}$ .
