# Supplementary material for: Differentiation Potential of Mesenchymal Stem Cells Is Related to Their Intrinsic Mechanical Properties
Source: PubMed Central journal article supplement — Int Neurourol J. 2017 Apr 21;21(Suppl 1):S24–31. doi: 10.5213/inj.1734856.428 (PMC5426435; doi:10.5213/inj.1734856.428), 2017-04-21
Supplement: inj-1734856-428-suppl2.pdf [file inj-1734856-428-suppl2.pdf]

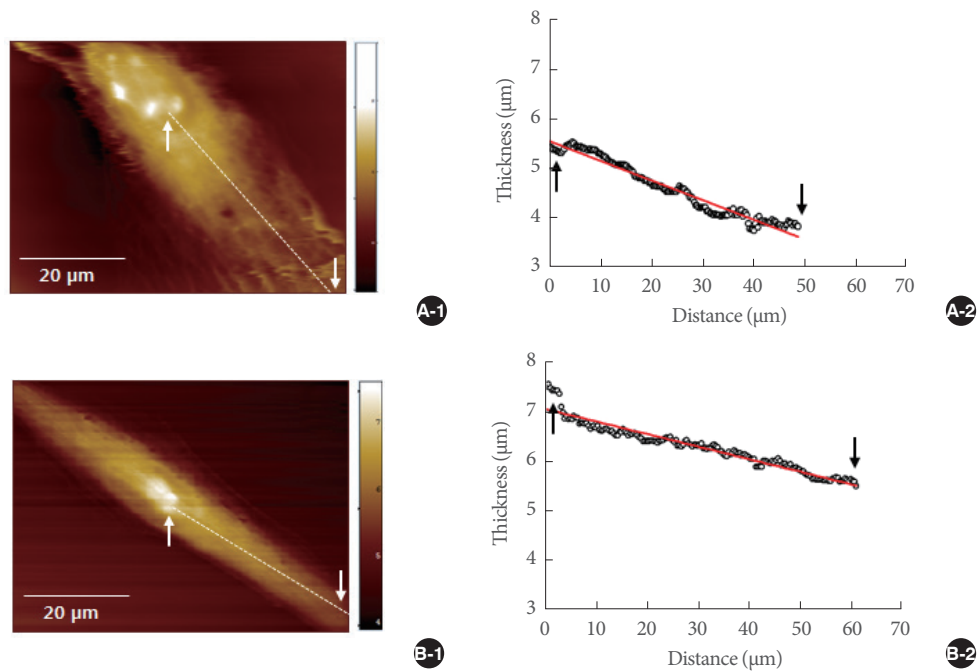

**Supplementary Fig. 2.** Atomic force microscopy (AFM) images of ADSCs (A-1) and UCSCs (B-1), respectively. The different colors in the images indicate different heights of the cells: the light and dark colors correspond to higher and lower regions, respectively. The line profiles taken from AFM images are indicated by white dotted lines (A-2, B-2). The start and end points are indicated by white (A-1, B-1) and dark arrows (A-2, B-2). The red lines indicate the linear fit to the data. MSCs, mesenchymal stem cells; ADSCs, adipose-derived MSCs; UCSCs, umbilical cord-derived MSCs.
