# Supplementary material for: Differentiation Potential of Mesenchymal Stem Cells Is Related to Their Intrinsic Mechanical Properties
Source: PubMed Central journal article supplement — Int Neurourol J. 2017 Apr 21;21(Suppl 1):S24–31. doi: 10.5213/inj.1734856.428 (PMC5426435; doi:10.5213/inj.1734856.428), 2017-04-21
Supplement: inj-1734856-428-suppl3.pdf [file inj-1734856-428-suppl3.pdf]

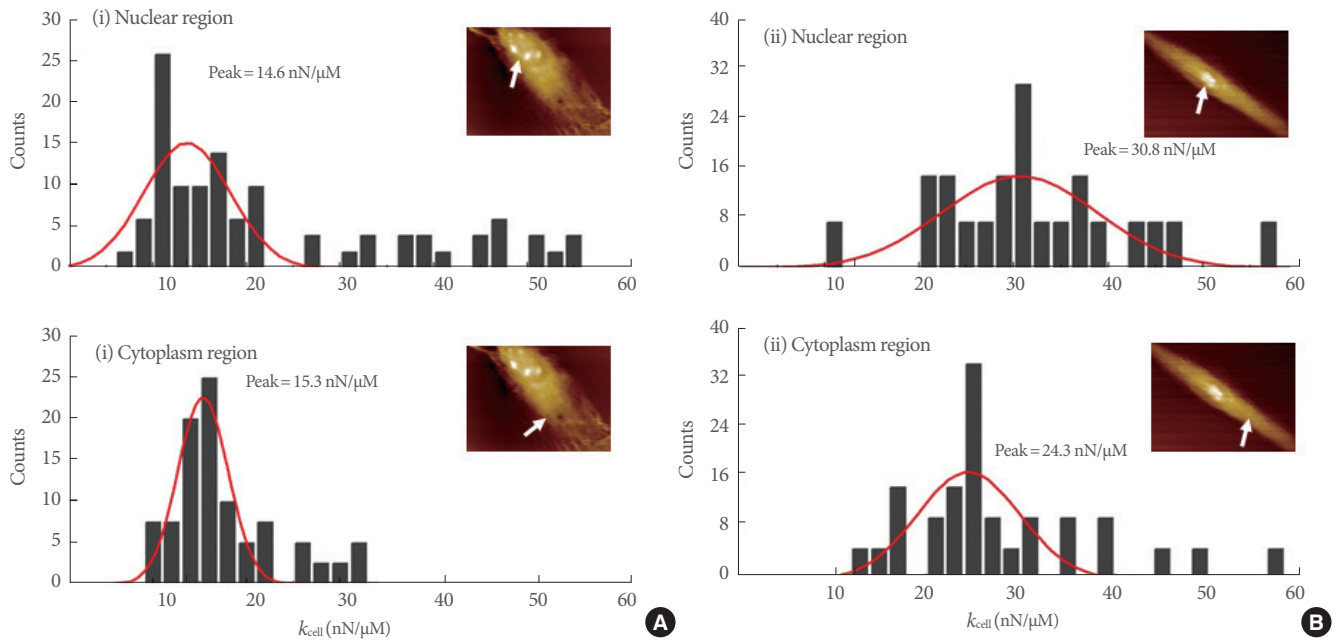

**Supplementary Fig. 3.** Distribution of stiffness in ADSCs (A) and UCSCs (B). Stiffness was measured separately in the nuclear and cytoplasm regions. Inset shows the atomic force microscopy image of ADSCs as an example of the region selected to measure the stiffness of a cell ( $k_{cell}$ ). The red lines indicate the Gaussian fit to the data. MSCs, mesenchymal stem cells; ADSCs, adipose-derived MSCs; UCSCs, umbilical cord-derived MSCs.
